## Meiotic actin rings are essential for proper sporulation in fission yeast

Hongyan Yan and Mohan K. Balasubramanian

*Journal of Cell Science* 125, 2544  
© 2012. Published by The Company of Biologists Ltd  
doi: 10.1242/jcs.113316

There was an error published in *J. Cell Sci.* **125**, 1429-1439.

The doi number for this paper did not match the doi number of the version published as an Advance Online Publication.

The correct doi number should be 10.1242/jcs.jcs091561.

We apologise for this error.
